# Supplementary material for: Peptide-based targeting of fluorescent zinc sensors to the plasma membrane of live cells
Source: Royal Society of Chemistry journal article supplement (doi:10.1039/c3sc50974e), 2013-01-01
Supplement: c3sc50974e.pdf [file c3sc50974e.pdf]

## Supplementary Information

### Peptide-based Targeting of Fluorescent Zinc Sensors to the Plasma Membrane of Live Cells

Robert J. Radford, Wen Chyan, and Stephen J. Lippard\*

Department of Chemistry, Massachusetts Institute of Technology, 77 Massachusetts Avenue, Cambridge, MA 02139

| <u>Page</u> | <u>Contents</u> |
|-------------|-----------------|
|-------------|-----------------|

|     |                                                    |
|-----|----------------------------------------------------|
| S1  | Materials, methods, and experimental details       |
| S1  | Synthesis and purification of Palm-ZP1             |
| S2  | Synthesis and purification of Palm-ZQ              |
| S2  | Photophysical and zinc-binding studies of Palm-ZP1 |
| S3  | Photophysical and zinc-binding studies of Palm-ZQ  |
| S3  | Mammalian cell culture and imaging procedures      |
| S4  | Supporting Figures and Tables                      |
| S10 | References                                         |

|  |                                              |
|--|----------------------------------------------|
|  | <u>List of Supporting Figures and Tables</u> |
|--|----------------------------------------------|

|     |                                                                                                                                 |
|-----|---------------------------------------------------------------------------------------------------------------------------------|
| S4  | <b>Figure S1.</b> Analytical HPLC chromatogram of Palm-ZP1.                                                                     |
| S5  | <b>Figure S2.</b> ESI-MS of Palm-ZP1.                                                                                           |
| S5  | <b>Figure S3.</b> Analytical HPLC chromatogram of Palm-ZQ.                                                                      |
| S6  | <b>Figure S4.</b> ESI-MS of Palm-ZQ.                                                                                            |
| S6  | <b>Figure S5.</b> Fluorescence spectra, zinc-binding isotherms and fits for Palm-ZP1 and ZP1.                                   |
| S6  | <b>Table 1.</b> Photophysical and zinc-binding properties of Palm-ZP1 and ZP1.                                                  |
| S7  | <b>Figure S6.</b> Comparing the cellular localization of Palm-ZP1 and ZP1 in live HeLa cells.                                   |
| S7  | <b>Figure S7.</b> DIC and fluorescence microscopy images from <b>Figure 5</b> .                                                 |
| S8  | <b>Figure S8.</b> DIC and fluorescence microscopy images from <b>Figure 6</b> .                                                 |
| S8  | <b>Figure S9.</b> Fluorescence spectra, zinc-binding isotherms and fits for Palm-ZQ and TSQ.                                    |
| S9  | <b>Table 2.</b> Photophysical and zinc-binding properties of Palm-ZQ and TSQ.                                                   |
| S9  | <b>Figure S10.</b> DIC, Mitotracker Red, and Palm-ZQ images for investigation into Palm-ZQ zinc responsiveness in RWPE-1 cells. |
| S10 | <b>Figure S11.</b> Live cell imaging of Palm-ZQ in HeLa cells.                                                                  |

## Materials and Methods

HPLC grade acetonitrile, anhydrous *N,N*-dimethylformamide (DMF), dichloromethane, 4-methylpiperidine, *N,N*-diisopropylethylamine (DIPEA), trifluoroacetic acid (TFA), triisopropylsilane, and palmitic acid were purchased from Sigma-Aldrich. Fmoc-Pro-OH, Fmoc-Asp(OtBu)-OH, and Rink amide AM resin (0.61 mmol/g, 100-200 mesh) were obtained from Novabiochem. Fmoc-Lys(MTT)-OH was purchased from Aapptec. 2-(7-Aza-1H-benzotriazole-1-yl)-1,1,3,3-tetramethyluronium hexafluorophosphate (HATU) was procured from Oakwood Chemicals. *N*-(6-Methoxy-8-quinolyl)-*p*-toluenesulfonamide (TSQ) was acquired from Enzo Life Sciences. Disposable 2.5-mL reaction vessels were ordered from Torviq. All solvents were reagent grade unless otherwise specified, and commercially available reagents were used as received. 6-CO<sub>2</sub>H ZP1<sup>1</sup> and zinquin<sup>2</sup> were prepared according to literature procedures. Reverse-phase HPLC purifications were carried out on an Agilent Technologies 1200 Series HPLC system. Mass spectra were collected on an 1100-series Agilent LC/MSD ion trap. Aqueous solutions were prepared using Millipore water. Molecular biology grade piperazine-*N,N'*-bis(2-ethanesulfonic acid) (PIPES) and 99.999% KCl were purchased from Aldrich. In order to remove adventitious metal ions, buffered solutions were treated with Chelex resin (Bio-Rad) according to manufacturer specifications. A 50 mM zinc(II) stock solution was prepared using 99.999% ZnCl<sub>2</sub> (Aldrich). UV-vis spectra were recorded on a Varian Cary 50 Bio UV-visible spectrophotometer. Fluorescence spectra were recorded on a Quanta Master 4 L-format scanning spectrofluorimeter (Photon Technology International). The acquisition temperature was kept at 25 ± 0.1 °C by circulating water bath. Sample solutions were placed in quartz cuvettes (Starna) with 1 cm path lengths. Stock solutions of Palm-ZP1 and Palm-ZQ were prepared in DMSO, partitioned in 50 µL aliquots and stored in the dark at -40° C.

## Peptide Synthesis

Peptides were manually synthesized according to a modified literature protocol<sup>3</sup> as outlined below.

### *Palm-ZP1 (Palmitic acid-PPPDDK(ZP1)-CONH<sub>2</sub>)*

Palm-ZP1 was synthesized on the 15-µmol scale using Rink amide AM resin. The resin was placed in a fritted 2.5-mL Torviq disposable syringe and swelled with 2 mL of anhydrous DMF for 1 hour prior to synthesis. *N*-terminal Fmoc groups were removed by treating the resin with a solution of 20% 4-methylpiperidine in DMF (v/v) for a period of 10 min, followed by a 5 × 1.5 mL wash with DMF. For all coupling reactions, 60 µmol (4 equiv.) of Fmoc-protected amino acids, palmitic acid, or 6-CO<sub>2</sub>H ZP1 were combined as solids with 60 µmol (23 mg) of HATU. Immediately prior to coupling, solids were dissolved in 1.5 mL of a freshly prepared 10% DIPEA/DMF (v/v) solution, placed in the reaction vessel and shaken for 25 min. After the allotted time, the resulting solution was expelled from the syringe and the resin was washed with 5 × 1.5 mL of DMF. Following addition of all amino acids and the *N*-terminal palmitic acid moiety, the 4-methyltrityl group was removed from the *C*-terminal Lys according to manufacturer specifications.<sup>4</sup> Briefly, the resin was first exchanged into dichloromethane (DCM). A 3% TFA/DCM (v/v) solution was prepared, and the resin was mixed with the TFA/DCM mixture 2 × 1.5 mL for 10 min/ea. During equilibration, the TFA/DCM solution turned bright yellow, indicating that MTT was being liberated. After MTT deprotection, the resin was washed with 5 × 1.5 mL DCM followed by 5 × 1.5 mL DMF. The 6-CO<sub>2</sub>H ZP1 was then coupled to the ε-amino group of the *C*-terminal Lys as described above. Following Palm-ZP1 synthesis, the resin was washed with 5 × 1.5 mL DCM and dried in vacuo for a period of ≥20 min prior to cleavage. Palm-ZP1 was cleaved from the resin by treating with a TFA/water/triisopropylsilane 95/2.5/2.5% (v/v) solution for 90 min. The resulting crude peptide was purified by HPLC on the semi-preparative scale using a C18 reverse-phase

column (VYDAC, 9.5 mm × 250 mm). A two-solvent system (A = 0.1% (v/v) TFA in H<sub>2</sub>O; B = 0.1% TFA in acetonitrile (v/v)) was employed for purification according to the following protocol: isocratic flow, 20 % B, 0-5 min; gradient #1, 10-50% B, 5-10 min; gradient #2, 50-95% B, 10-35 min. The flow-rate was kept constant at 3 mL min<sup>-1</sup> throughout the purification. Fractions from sequential runs containing Palm-ZP1 were pooled and lyophilized. The purity of the final product was assessed via analytical HPLC (Vydac, C18, 5 μm, 4.6 mm i.d. x 250 mm). After a 5 min isocratic wash, a linear gradient of 10-75% B was run over 30 min (35 min total) at a flow rate of 1 mL min<sup>-1</sup>. Palm-ZP1 (retention time = 31.2 min) was judged to be ≥ 95% pure at all wavelengths based on the integrated chromatograms (**Figure S1**). Observed peaks for Palm-ZP1, C<sub>92</sub>H<sub>112</sub>C<sub>12</sub>N<sub>14</sub>O<sub>17</sub>, in ESI-MS (m/z, amu; (calculated)): 1755.8 (1755.3) [M+H]<sup>+</sup>, 878.2 (878.3) [M+2H]<sup>2+</sup>, 585.7 (585.8) [M+3H]<sup>3+</sup> (**Figure S2**).

#### *Palm-ZQ (Palmitic acid-PPPDDK(ZQ)-CONH<sub>2</sub>)*

Palm-ZQ was synthesized on the 15-μmol scale in a procedure similar to that used for Palm-ZP1. For conjugation of zinquin to the ε-amino group of the C-terminal Lys, 60 μmol (23 mg) of zinquin acid was mixed with 60 μmol (23 mg) of HATU in freshly prepared 10% DIPEA/DMF (v/v). The mixture was allowed to react with the resin for a period of 60 min, after which the resin was washed, cleaved, and purified. Palm-ZQ was purified via HPLC, using a two buffer system (*vide supra*), employing the following protocol: 1) isocratic flow, 10 % B, 0-2 min; 2) linear gradient A, 10-50 % B, 2-5 min; 3) linear gradient B, 50-99 % B, 5-25 min, all at a flow rate of 3 mL min<sup>-1</sup>. Fractions containing Palm-ZQ from sequential runs were pooled and lyophilized. The purity of the final product was assessed via analytical HPLC (Vydac, C18, 5 μm, 4.6 mm i.d. x 250 mm). After an initial 5 min isocratic wash (10% B), a linear gradient of 10-95% B was run over 35 min (40 min total) at a flow rate of 1 mL min<sup>-1</sup>. Palm-ZQ (retention time = 38.6 min) was judged to be ≥ 90% pure at all wavelengths based on the integrated chromatogram (**Figure S3**). Observed peaks for Palm-ZQ, C<sub>64</sub>H<sub>92</sub>N<sub>10</sub>O<sub>15</sub>S, in ESI-MS (m/z, amu; (calculated)): 1295.7 (1295.6) [M+Na]<sup>+</sup>, 1274.0 (1273.6) [M+H]<sup>+</sup> (**Figure S4**).

#### *Photophysical and Zinc-Binding Properties of Palm-ZP1*

Spectroscopic measurements for Palm-ZP1 were carried out in a mixed solvent system consisting of 25 mM PIPES buffer (pH 7) with 50 mM KCl and 50% acetonitrile (v/v) (**Figure 2** and **S5**). Except where noted, all fluorescence data were obtained by exciting at 495 nm and observing from 500-650 nm, with 0.1 sec integration time and slit widths of 0.4 mm (1.6 nm). Emission spectra represent the average of three scans. The quantum yield of Palm-ZP1 was referenced to fluorescein in 0.1 M NaOH<sub>(aq)</sub>, which has a known quantum yield of φ = 0.95.<sup>5</sup>

#### *Apparent K<sub>d-Zn</sub> for Palm-ZP1:*

Apparent zinc-binding affinities (K<sub>d-Zn</sub>) were determined by a modified literature procedure.<sup>6</sup> For each zinc-binding titration, 1 mM EDTA and 2 mM CaCl<sub>2</sub> were added to the MeCN/PIPES buffered solution. Palm-ZP1 or ZP1 was added, and the system was allowed to reach equilibrium (30 min). Aliquots of ZnCl<sub>2</sub> were successively added, and the emission spectra recorded once the emission spectrum stabilized (~30 min). The amount of free zinc for a given concentration of total zinc was calculated using the maxchelator program (<http://maxchelator.stanford.edu/webmaxc/webmaxcS.htm>) based on initial values of 1 mM EDTA, 2mM CaCl<sub>2</sub>, an ionic strength of I = 0.05 mol dm<sup>-3</sup>, and a pH of 7.0. Due to the addition of acetonitrile to the buffered solution, we compared the apparent K<sub>d-Zn</sub> for Palm-ZP1 to ZP1 under identical conditions (**Figure S5** and **Table S1**).

#### *Photophysical and Zinc-Binding Properties of Palm-ZQ*

Characterization of Palm-ZQ (**Figure 7**) was performed in 25 mM PIPES buffer (pH 7) with 50 mM KCl, and 50% (v/v) acetonitrile. Zinc affinities ( $K_{d-Zn}$ ) were compared to TSQ under identical conditions (**Figure S9** and **Table S2**). Quantum yields for Palm-ZQ and TSQ were referenced to quinine sulfate in 0.1 M  $H_2SO_4$ , which has a known quantum yield of  $\phi = 0.55$ .<sup>7</sup>

#### *Apparent $K_{d-Zn}$ for Palm-ZQ:*

Apparent zinc-binding affinities ( $K_{d-Zn}$ ) were determined using a modified literature procedure.<sup>2</sup> For each zinc-binding titration, 2 mM EGTA was added to the MeCN/PIPES buffered solution. Palm-ZQ or TSQ was added and the system was allowed to reach equilibrium before beginning the titration (30 min). Aliquots of  $ZnCl_2$  were successively added, and the emission spectra recorded once the emission spectrum stabilized (~30 min). The amount of free zinc for a given concentration of total zinc was calculated using the maxchelator program (<http://maxchelator.stanford.edu/webmaxc/webmaxcS.htm>) based on initial values of 2 mM EGTA at an ionic strength of  $I = 0.05 \text{ mol dm}^{-3}$  and a pH of 7.0. Due to the addition of acetonitrile to the buffered solution, we compared the apparent  $K_{d-Zn}$  for Palm-ZQ to TSQ under identical conditions (**Figure S9** and **Table S2**).

### **Mammalian Cell Culture, Labeling, and Imaging Procedures.**

#### *General*

HeLa cells were cultured at 37 °C under a 5%  $CO_2$  humidified atmosphere in Dulbecco's Modified Eagle Medium (High Glucose DMEM, Life Technologies) supplemented with 10% fetal bovine serum (FBS, HyClone), penicillin (100  $\mu\text{g/mL}$ ), and streptomycin (100  $\mu\text{g/mL}$ ). RWPE-1 cells were cultured at 37 °C under a 5%  $CO_2$  humidified atmosphere in keratinocyte serum-free media (Life Technologies) supplemented with prequalified human recombinant Epidermal Growth Factor 1-53 (EGF 1-53) and Bovine Pituitary Extract (BPE). For live cell imaging, cells were seeded in 35-mm poly-D-Lys coated glass-bottom culture dishes (MatTek Corporation).

#### *Palm-ZP1*

Palm-ZP1 (2.5  $\mu\text{M}$ ) was incubated for 30 min at 37° C and 5%  $CO_2$  in dye- and serum-free DMEM. For multichannel imaging and colocalization studies, staining of the plasma membrane was accomplished by addition of Cell Mask Orange (Life Technologies, final concentration 2.5  $\mu\text{g/mL}$ ) for 15-20 min. Prior to imaging, cells were rinsed with warm dye- and serum-free DMEM ( $2 \times 2 \text{ mL}$ ) and bathed in warm dye- and serum-free DMEM (2 mL). To assess the zinc responsiveness of Palm-ZP1, stock solutions of  $ZnCl_2$  (10 mM) were diluted in warm dye- and serum-free DMEM to a final  $ZnCl_2$  concentration of 50  $\mu\text{M}$ . The zinc-enriched media was exchanged in the cell culture dish directly on the microscope stage. Similarly, a stock solution of ethylenediaminetetraacetic acid (EDTA, 100 mM) in water (pH 7) was diluted in warm dye- and serum-free DMEM to a concentration of 100  $\mu\text{M}$ . Media containing EDTA was exchanged in the culture dishes on the microscope stage.

#### *Palm-ZQ*

Palm-ZQ (10  $\mu\text{M}$ ) was incubated for 30 min at 37° C and 5%  $CO_2$  in dye- and serum free DMEM. For multi-channel imaging and colocalization studies, staining of the mitochondria was accomplished by addition of Mitotracker Red (Life Technologies, final concentration: 1  $\mu\text{M}$ ) for 30 min. Prior to imaging, cells were rinsed with warm dye- and serum-free DMEM ( $2 \times 2 \text{ mL}$ ) and bathed in warm dye- and serum-free DMEM (2 mL). To assess the zinc responsiveness of Palm-ZQ, stock solutions of  $ZnCl_2$  (10 mM) were diluted in warm dye- and serum-free DMEM to a final  $ZnCl_2$  concentration of 50  $\mu\text{M}$ . The zinc-enriched media was exchanged in the cell culture dish directly on the microscope stage. Similarly, a stock solution of ethylenediaminetetraacetic acid (EDTA, 100 mM) in water (pH 7) was diluted

in warm dye- and serum-free DMEM to a concentration of 100  $\mu$ M. Media containing EDTA was exchanged in the culture dishes on the microscope stage.

### Fluorescence Microscopy

The imaging experiments were performed using a Zeiss Axiovert 200M inverted epifluorescence microscope equipped with an EM-CCD digital camera (Hamamatsu) and a MS200 XY Piezo Z stage (Applied Scientific Instruments). The light source was an X-Cite 120 metal-halide lamp (EXFO) and the fluorescence images were obtained using an oil-immersion objective at 63 $\times$  magnification. The microscope was operated using Volocity software (Perkin-Elmer).

### Quantification of Zinc Turn-On

Images were processed using ImageJ. All settings (i.e. exposure time and sensitivity) were kept constant for each image series.

### Pearson's correlation coefficients ( $r$ ):

To calculate  $r$ , images were first deconvoluted using a calculated point-spread function (PSF) map based on emission wavelength, refractive index of the media ( $n = 1.518$ ), and the numerical aperture (1.4). Deconvoluted channels (i.e. sensor and organelle trackers) were merged and analyzed. For each image, a minimum of three regions-of-interest (ROI) were selected and the  $r$ -value calculated using an ImageJ plugin.<sup>8</sup> This process was repeated for 3-5 plates, which spanned multiple passage numbers ( $\leq 15$ ) and days.

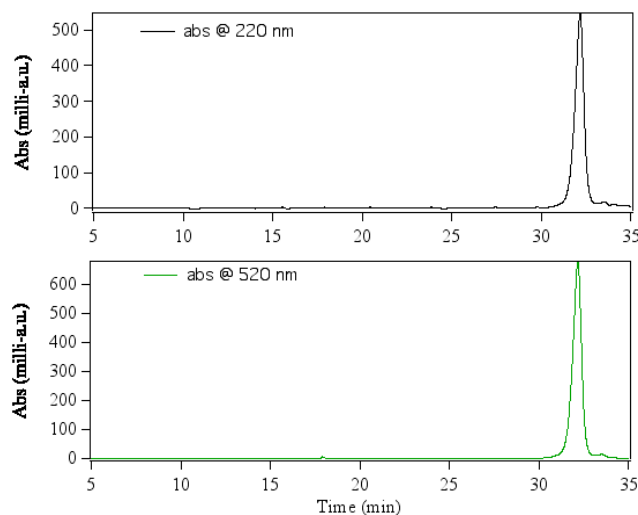

**Figure S1.** Analytical HPLC chromatogram of Palm-ZP1, monitoring absorbance at 220 and 520 nm. Palm-ZP1 was judged to be  $\geq 95\%$  pure based on the integrated absorbance signal at both wavelengths.

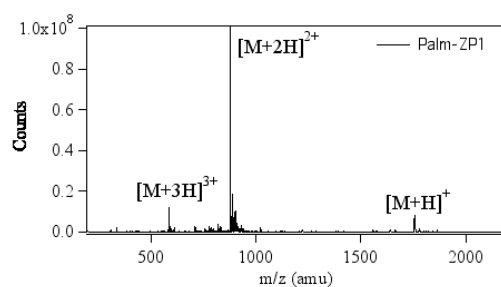

**Figure S2.** ESI-MS (positive mode) of Palm-ZP1.

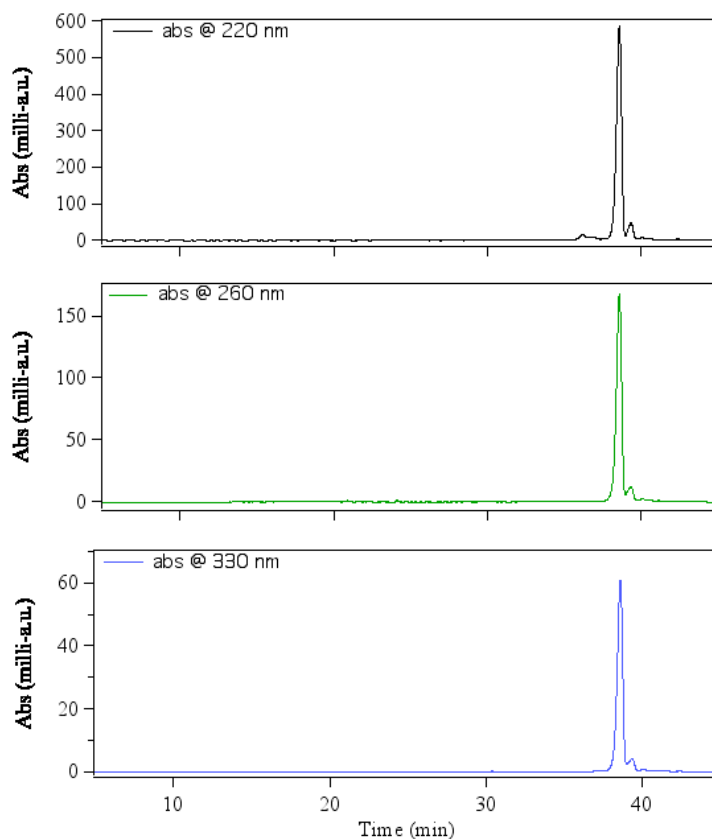

**Figure S3.** Analytical HPLC chromatogram of Palm-ZQ, monitoring absorbance at 220, 260, and 330 nm. Palm-ZQ was judged to be  $\geq 90\%$  pure based on the integrated absorbance signal of each wavelength.

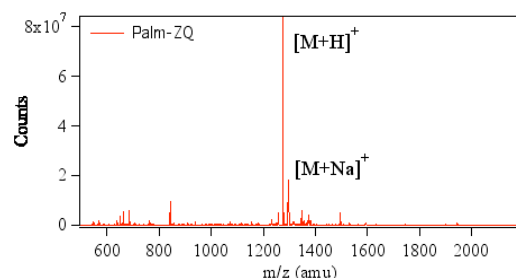

**Figure S4.** ESI-MS (positive mode) of Palm-ZQ.

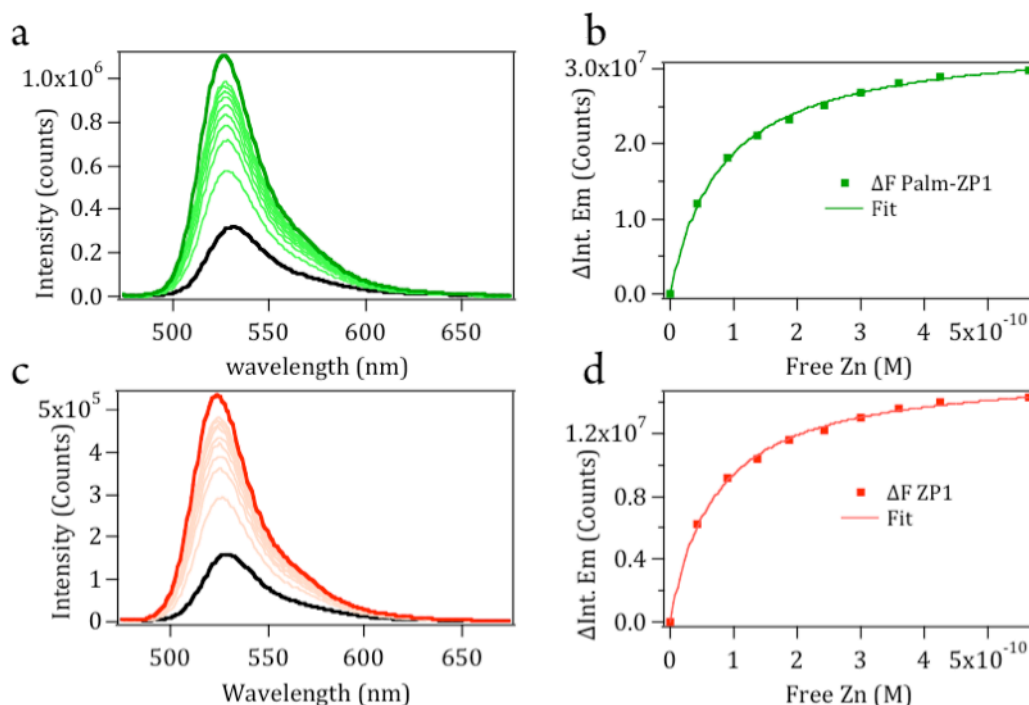

**Figure S5.** Measurement of the zinc-binding affinities, by fluorescence spectroscopy, for Palm-ZP1 (green) and ZP1 (red), in 25 mM PIPES buffer (pH 7) with 50 mM KCl, and 50% (v/v) acetonitrile. Changes in the emission spectra of Palm-ZP1 (a) and ZP1 (c) upon addition of increasing amounts of free zinc. Representative binding isotherms and fits for Palm-ZP1 (b) and ZP1 (d). Apparent  $K_{d-Zn}$  values reported are the average of three trials and are listed in Table S1. Samples were excited at 470 nm with an emission window of 475-675 nm.

**Table S1.** Photophysical and zinc-binding properties of Palm-ZP1 and ZP1.

| Sensor                                                 | Abs $\lambda$ (nm), $\epsilon \times 10^4$ (M <sup>-1</sup> cm <sup>-1</sup> ) |          | $\phi_{apo}$ | $\phi_{Zn}$ | $K_{d-Zn}$ (M)                        | Normalized $K_{d-Zn}$ |
|--------------------------------------------------------|--------------------------------------------------------------------------------|----------|--------------|-------------|---------------------------------------|-----------------------|
|                                                        | Apo                                                                            | Zn(II)   |              |             |                                       |                       |
| Palm-P <sub>3</sub> D <sub>2</sub> K(ZP1) <sup>a</sup> | 517, 6.6                                                                       | 506, 7.4 | 0.16±0.053   | 0.79±0.049  | $8.2(3) \times 10^{-11}$              | 1.15                  |
| ZP1 <sup>b</sup>                                       | 515, 7.9                                                                       | 507, 8.4 | 0.38         | 0.87        | $7.1(3) \times 10^{-11}$ <sup>c</sup> | 1                     |

<sup>a</sup> Spectroscopic data and apparent zinc dissociation constants ( $K_{d-Zn}$ ) were determined in 25 mM PIPES buffer (pH 7) with 50 mM KCl and 50% (v/v) acetonitrile. <sup>b</sup> Quantum yield, absorption, and extinction coefficient values were taken from literature.<sup>1</sup>

<sup>c</sup> For comparison, the  $K_{d-Zn}$  for ZP1 was determined under identical conditions. ZP1 has a known  $K_{d-Zn}$  of 0.7 nM, in 50 mM PIPES buffer (pH 7), 100 mM KCl.



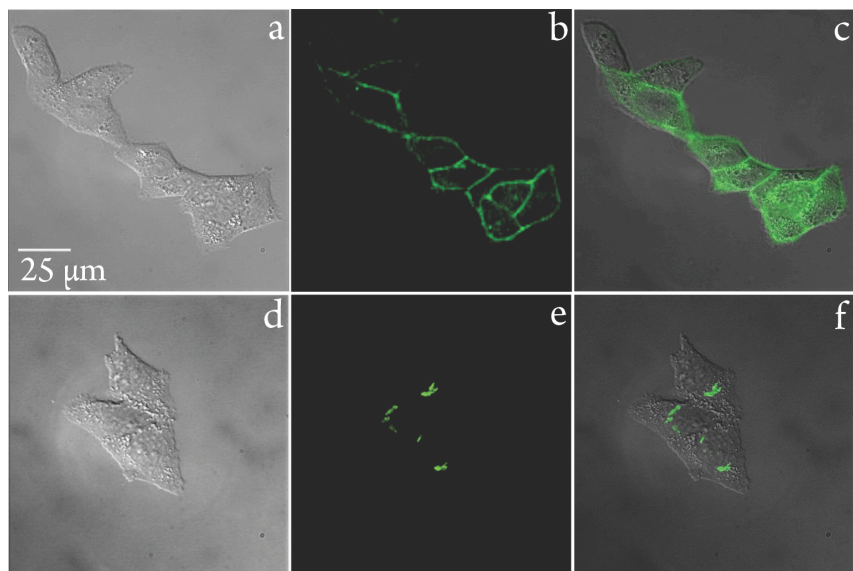

**Figure S6.** The observed localization of zinc-bound Palm-ZP1 and ZP1 in live HeLa cells. Top row: (a) DIC image of cells pretreated with a 2.5  $\mu\text{M}$  solution of Palm-ZP1, (b) emission from zinc-bound Palm-ZP1, (c) overlay of (a) and (b). Bottom row: (d) DIC image of cells pretreated with 5  $\mu\text{M}$  of ZP1 (e) emission from zinc-bound ZP1, (f) overlay of (d) and (e).

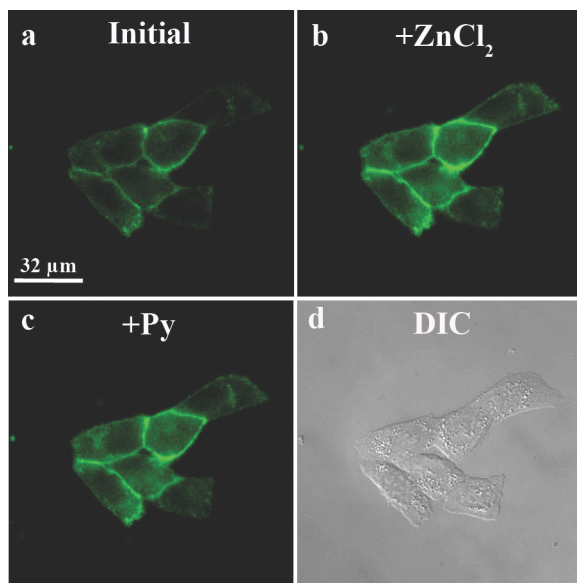

**Figure S7.** Imaging Palm-ZP1 in live HeLa cells via fluorescence microscopy. The fluorescence signal from Palm-ZP1, (a) initially, (b) after addition of 50  $\mu\text{M}$   $\text{ZnCl}_2$ , and (c) after addition of 100  $\mu\text{M}$  sodium pyruvate, and (d) the DIC image for the set.



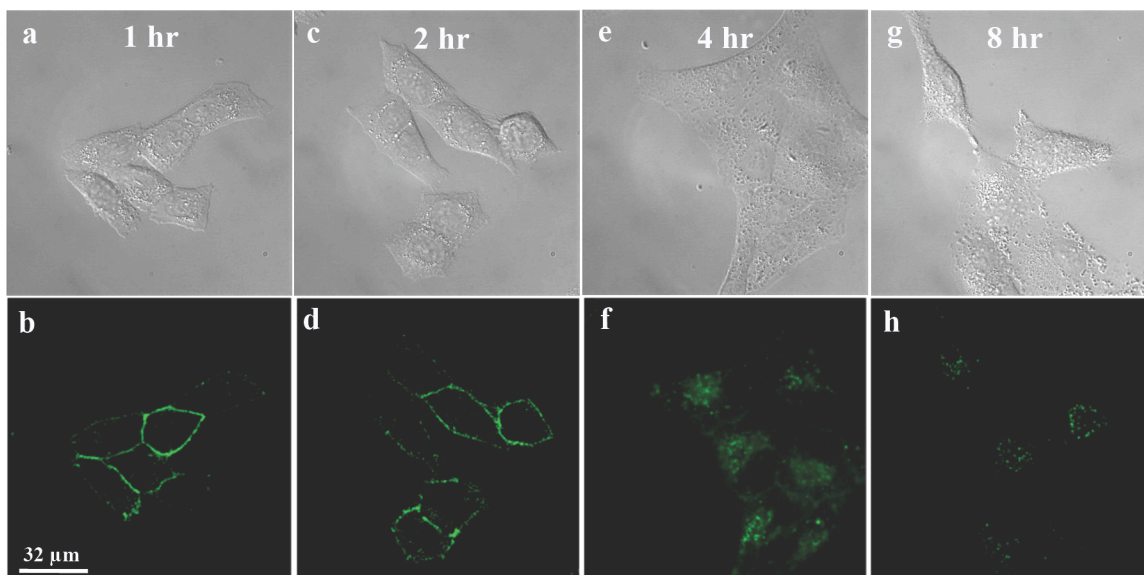

**Figure S8.** DIC and fluorescence microscopy images of HeLa cells that were incubated with Palm-ZP1 for 1 (a,b) 2 (c,d), 4 (e,f) or 8 hr (g,h) at 37 °C and 5 % CO<sub>2</sub>.

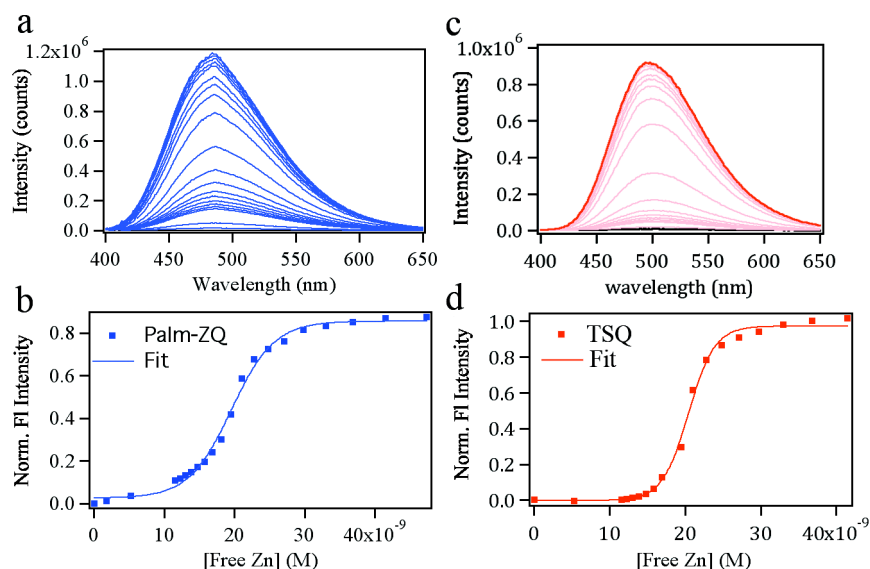

**Figure S9.** Measurement of the zinc-binding affinities, by fluorescence spectroscopy, of Palm-ZQ (blue) and TSQ (red) in 25 mM PIPES buffer (pH 7) with 50 mM KCl, and 50% (v/v) acetonitrile. Observed changes in the emission spectra of Palm-ZQ (a) and TSQ (c) upon addition of increasing amounts of free zinc. Representative normalized binding isotherm and fits for Palm-ZQ (b) and TSQ (d). Apparent  $K_{d-Zn}$  values, which are the average of three trials, are given in Table S2.

**Table S2.** Photophysical and zinc-binding properties of Palm-ZQ and TSQ.

| Sensor  | Abs $\lambda$ (nm), $\epsilon \times 10^3$ (M <sup>-1</sup> cm <sup>-1</sup> ) |                       | $\phi_{apo}$ | $\phi_{Zn}$     | $K_{d-Zn}$ (M)            | Normalized $K_{d-Zn}$ |
|---------|--------------------------------------------------------------------------------|-----------------------|--------------|-----------------|---------------------------|-----------------------|
|         | Apo                                                                            | Zn(II)                |              |                 |                           |                       |
| Palm-ZQ | 244, 39.2<br>336, 3.9                                                          | 263, 33.9<br>360, 3.6 | $\leq 0.014$ | 0.35 $\pm$ 0.02 | 1.95 (2) $\times 10^{-8}$ | 0.975                 |
| TSQ     | 336, 3.5                                                                       | 360, 3.5              | $\leq 0.002$ | 0.34 $\pm$ 0.03 | 2.00 (2) $\times 10^{-8}$ | 1                     |

<sup>a</sup> Spectroscopic data and apparent zinc dissociation constants ( $K_{d-Zn}$ ) were determined in 25 mM PIPES buffer (pH 7) with 50 mM KCl and 50% (v/v) acetonitrile. <sup>b</sup> Quantum yield, absorption, and extinction coefficient values were taken from literature. <sup>c</sup> For comparison, the  $K_{d-Zn}$  for TSQ was determined under identical conditions.

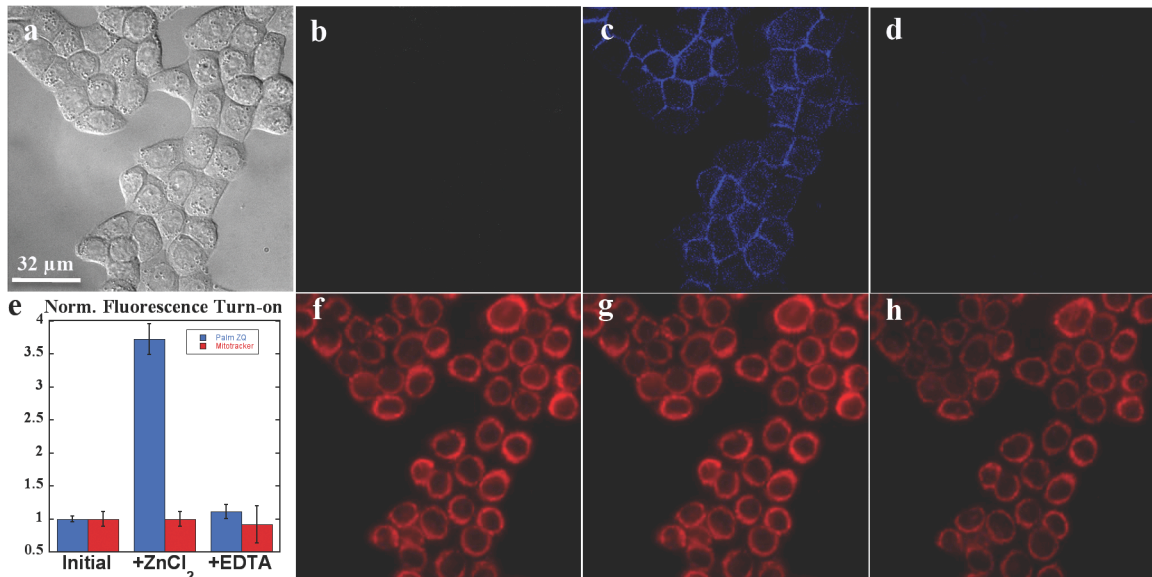

**Figure S10.** Zinc response of Palm-ZQ in live cell fluorescence imaging of RWPE-1 cells. (a) DIC Image. Signal intensity from Palm-ZQ, initially (b), after addition of 50  $\mu$ M  $ZnCl_2$  (c), and after addition of 100  $\mu$ M EDTA (d). (e) Average normalized fluorescence signal of Palm-ZQ and Mitotracker red during live cell imaging. (n = 20). Signal Intensity from Mitotracker Red, initially (f), after addition of 50  $\mu$ M  $ZnCl_2$  (g), and after addition of 100  $\mu$ M EDTA (h).

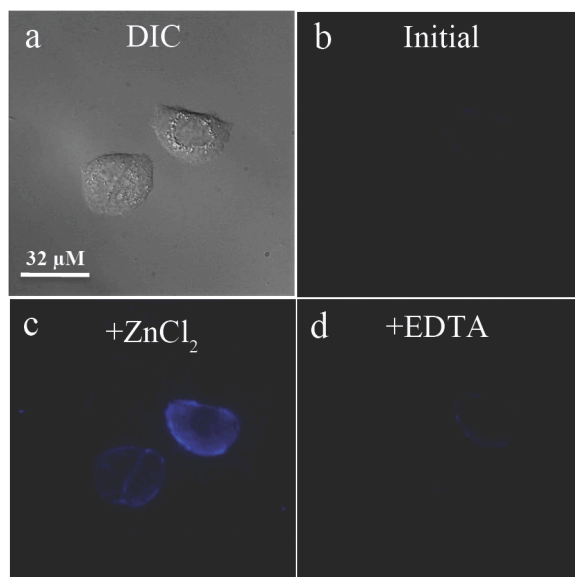

**Figure S11.** Zinc response of Palm-ZQ in live HeLa cells as monitored by fluorescence microscopy. (a) DIC. (b) Initial signal intensity from Palm-ZQ. (c) Emission after addition of 50  $\mu\text{M}$   $\text{ZnCl}_2$ . (d) Signal after addition of 100  $\mu\text{M}$  EDTA.

## References

- (1) (a) Woodrooffe, C. C.; Masalha, R.; Barnes, K. R.; Frederickson, C. J.; Lippard, S. J. *Chem. Biol.* **2004**, *11*, 1659; (b) Nolan, E. M.; Lippard, S. J. *Acc. Chem. Res.* **2009**, *42*, 193.
- (2) Fahrni, C. J.; O'Halloran, T. V. *J. Am. Chem. Soc.* **1999**, *121*, 11448.
- (3) Kirin, S. I.; Noor, F.; Metzler-Nolte, N.; Mier, W. *J. Chem. Educ.* **2007**, *84*, 108.
- (4) [http://www.anaspec.com/html/peptide\\_tips.html](http://www.anaspec.com/html/peptide_tips.html)
- (5) Lakowicz, J. R. *Principles of fluorescence spectroscopy*; 2nd ed.; Kluwer Academic/Plenum: New York, 1999.
- (6) Walkup, G. K.; Burdette, S. C.; Lippard, S. J.; Tsien, R. Y. *J. Am. Chem. Soc.* **2000**, *122*, 5644.
- (7) Eastman, J. W. *Photochem. Photobio.* **1967**, *6*, 55.
- (8) French, A. P.; Mills, S.; Swarup, R.; Bennett, M. J.; Pridmore, T. P. *Nat. Protoc.* **2008**, *3*, 619.
